# Supplementary material
Source: publisher figshare collection journal article supplement (https://acs.figshare.com/ndownloader/files/4293115)
Supplement: Supplementary file 1 [file 4293115]

data_101220_S4_ZL

_publ_requested_journal           '?'
_audit_creation_method            SHELXL-97
_chemical_absolute_configuration  ad
_chemical_formula_moiety          'C16 H15 N O3 S'
_chemical_formula_sum             'C16 H15 N O3 S'
_chemical_formula_weight          301.35
_chemical_melting_point           ?
_chemical_name_common             ?
_chemical_name_systematic         '?'
loop_
  _atom_type_symbol
  _atom_type_description
  _atom_type_scat_dispersion_real
  _atom_type_scat_dispersion_imag
  _atom_type_scat_source
 'C' 'C' 0.0033 0.0016 'International Tables Vol C Tables 4.2.6.8 and 6.1.1.4'
 'H' 'H' 0.0000 0.0000 'International Tables Vol C Tables 4.2.6.8 and 6.1.1.4'
 'N' 'N' 0.0061 0.0033 'International Tables Vol C Tables 4.2.6.8 and 6.1.1.4'
 'O' 'O' 0.0106 0.0060 'International Tables Vol C Tables 4.2.6.8 and 6.1.1.4'
 'S' 'S' 0.1246 0.1234 'International Tables Vol C Tables 4.2.6.8 and 6.1.1.4'

_symmetry_cell_setting            'Orthorhombic'
_symmetry_space_group_name_H-M    'P 21 21 21'
_symmetry_space_group_name_Hall   'P 2ac 2ab'
loop_
  _space_group_symop_id
  _space_group_symop_operation_xyz
 1 'x, y, z'
 2 '-x+1/2, -y, z+1/2'
 3 'x+1/2, -y+1/2, -z'
 4 '-x, y+1/2, -z+1/2'

_cell_angle_alpha                 90.00
_cell_angle_beta                  90.00
_cell_angle_gamma                 90.00
_cell_formula_units_Z             4
_cell_length_a                    10.4870(8)
_cell_length_b                    11.7829(8)
_cell_length_c                    12.0638(8)
_cell_measurement_reflns_used     1674
_cell_measurement_temperature     293(2)
_cell_measurement_theta_max       29.1326
_cell_measurement_theta_min       3.0943
_cell_volume                      1490.68(18)
_exptl_absorpt_coefficient_mu     0.226
_exptl_absorpt_correction_T_max   1.0
_exptl_absorpt_correction_T_min   0.99044
_exptl_absorpt_correction_type    multi-scan
_exptl_absorpt_process_details    
;
CrysAlisPro, Oxford Diffraction Ltd.,
Version 1.171.34.40 (release 27-08-2010 CrysAlis171 .NET)
(compiled Aug 27 2010,11:50:40)
Empirical absorption correction using spherical harmonics,
implemented in SCALE3 ABSPACK scaling algorithm.
;
_exptl_crystal_F_000              632
_exptl_crystal_colour             red
_exptl_crystal_density_diffrn     1.343
_exptl_crystal_density_meas       ?
_exptl_crystal_density_method     'not measured'
_exptl_crystal_description        block
_exptl_crystal_size_max           0.40
_exptl_crystal_size_mid           0.40
_exptl_crystal_size_min           0.30
_exptl_special_details            '?'
_diffrn_ambient_temperature       292.85
_diffrn_detector_area_resol_mean  16.0874
_diffrn_measured_fraction_theta_full 0.996
_diffrn_measured_fraction_theta_max 0.996
_diffrn_measurement_details       
;
#__ type_ start__ end____ width___ exp.time_
1 omega  -83.00  -32.00   1.0000    8.0000
omega____ theta____ kappa____ phi______ frames
-      -16.8924  179.0000   60.0000 51

#__ type_ start__ end____ width___ exp.time_
2 omega  -80.00  -34.00   1.0000    8.0000
omega____ theta____ kappa____ phi______ frames
-      -16.8924  179.0000  -30.0000 46

#__ type_ start__ end____ width___ exp.time_
3 omega   -1.00   45.00   1.0000    8.0000
omega____ theta____ kappa____ phi______ frames
-       19.8611   38.0000  -90.0000 46
;
_diffrn_measurement_device_type   'Xcalibur, Eos'
_diffrn_measurement_method        '\w scans'
_diffrn_orient_matrix_UB_11       -0.0250106
_diffrn_orient_matrix_UB_12       -0.0475712
_diffrn_orient_matrix_UB_13       0.0286984
_diffrn_orient_matrix_UB_21       -0.0321923
_diffrn_orient_matrix_UB_22       -0.0174186
_diffrn_orient_matrix_UB_23       -0.0488936
_diffrn_orient_matrix_UB_31       0.0538685
_diffrn_orient_matrix_UB_32       -0.0325185
_diffrn_orient_matrix_UB_33       -0.0158411
_diffrn_radiation_monochromator   graphite
_diffrn_radiation_source          'fine-focus sealed tube'
_diffrn_radiation_type            'Mo K\a'
_diffrn_radiation_wavelength      0.7107
_diffrn_reflns_av_R_equivalents   0.0165
_diffrn_reflns_av_sigmaI/netI     0.0453
_diffrn_reflns_limit_h_max        11
_diffrn_reflns_limit_h_min        -13
_diffrn_reflns_limit_k_max        12
_diffrn_reflns_limit_k_min        -14
_diffrn_reflns_limit_l_max        9
_diffrn_reflns_limit_l_min        -15
_diffrn_reflns_number             4139
_diffrn_reflns_theta_full         26.37
_diffrn_reflns_theta_max          26.37
_diffrn_reflns_theta_min          3.10
_diffrn_standards_decay_%         ?
_diffrn_standards_interval_count  ?
_diffrn_standards_interval_time   ?
_diffrn_standards_number          ?
_reflns_number_gt                 2176
_reflns_number_total              2776
_reflns_threshold_expression      >2sigma(I)
_computing_cell_refinement        
;
CrysAlisPro, Oxford Diffraction Ltd.,
Version 1.171.34.40 (release 27-08-2010 CrysAlis171 .NET)
(compiled Aug 27 2010,11:50:40)
;
_computing_data_collection        
;
CrysAlisPro, Oxford Diffraction Ltd.,
Version 1.171.34.40 (release 27-08-2010 CrysAlis171 .NET)
(compiled Aug 27 2010,11:50:40)
;
_computing_data_reduction         
;
CrysAlisPro, Oxford Diffraction Ltd.,
Version 1.171.34.40 (release 27-08-2010 CrysAlis171 .NET)
(compiled Aug 27 2010,11:50:40)
;
_computing_molecular_graphics     
;
OLEX2: a complete structure solution, refinement and analysis program. Dolomanov et al., J. Appl. Cryst. (2009). 42, 339-341
;
_computing_publication_material   
;
OLEX2: a complete structure solution, refinement and analysis program. Dolomanov et al., J. Appl. Cryst. (2009). 42, 339-341
;
_computing_structure_refinement   'SHELXL-97 (Sheldrick, 1997)'
_computing_structure_solution     'SHELXS-97 (Sheldrick, 1990)'
_refine_diff_density_max          0.187
_refine_diff_density_min          -0.241
_refine_diff_density_rms          0.038
_refine_ls_R_factor_all           0.0650
_refine_ls_R_factor_gt            0.0475
_refine_ls_abs_structure_Flack    0.05(12)
_refine_ls_abs_structure_details  'Flack H D (1983), Acta Cryst. A39, 876-881'
_refine_ls_extinction_coef        ?
_refine_ls_extinction_method      none
_refine_ls_goodness_of_fit_ref    1.056
_refine_ls_hydrogen_treatment     constr
_refine_ls_matrix_type            full
_refine_ls_number_parameters      192
_refine_ls_number_reflns          2776
_refine_ls_number_restraints      0
_refine_ls_restrained_S_all       1.056
_refine_ls_shift/su_max           0.000
_refine_ls_shift/su_mean          0.000
_refine_ls_structure_factor_coef  Fsqd
_refine_ls_wR_factor_gt           0.1031
_refine_ls_wR_factor_ref          0.1146
_refine_ls_weighting_details      
;
calc w=1/[\s^2^(Fo^2^)+(0.0502P)^2^+0.0174P] where P=(Fo^2^+2Fc^2^)/3
;
_refine_ls_weighting_scheme       calc
_refine_special_details           
;
 Refinement of F^2^ against ALL reflections.  The weighted R-factor wR and 
 goodness of fit S are based on F^2^, conventional R-factors R are based 
 on F, with F set to zero for negative F^2^. The threshold expression of 
 F^2^ > 2sigma(F^2^) is used only for calculating R-factors(gt) etc. and is 
 not relevant to the choice of reflections for refinement.  R-factors based 
 on F^2^ are statistically about twice as large as those based on F, and R- 
 factors based on ALL data will be even larger. 
;
_atom_sites_solution_hydrogens    geom
_atom_sites_solution_primary      direct
_atom_sites_solution_secondary    difmap
loop_
  _atom_site_label
  _atom_site_type_symbol
  _atom_site_fract_x
  _atom_site_fract_y
  _atom_site_fract_z
  _atom_site_U_iso_or_equiv
  _atom_site_adp_type
  _atom_site_occupancy
  _atom_site_symmetry_multiplicity
  _atom_site_calc_flag
  _atom_site_refinement_flags
  _atom_site_disorder_assembly
  _atom_site_disorder_group
 S1 S -0.15091(8) -0.49792(8) -0.15212(8) 0.0680(3) Uani 1 1 d . . .
 O1 O -0.10729(17) -0.72815(14) 0.03983(15) 0.0393(4) Uani 1 1 d . . .
 O2 O -0.1346(2) -0.74792(16) 0.22158(17) 0.0602(6) Uani 1 1 d . . .
 O3 O 0.0951(2) -0.41153(17) 0.11816(16) 0.0580(6) Uani 1 1 d . . .
 H3 H 0.1097 -0.3591 0.1611 0.087 Uiso 1 1 calc R . .
 N1 N 0.0818(2) -0.57995(18) -0.02376(19) 0.0478(6) Uani 1 1 d . . .
 H1 H 0.0548 -0.5863 0.0432 0.057 Uiso 1 1 calc R . .
 C1 C -0.0694(3) -0.7647(2) 0.1400(2) 0.0426(7) Uani 1 1 d . . .
 C2 C 0.0518(3) -0.8228(2) 0.1290(2) 0.0509(8) Uani 1 1 d . . .
 H2 H 0.0984 -0.8554 0.1863 0.061 Uiso 1 1 calc R . .
 C3 C 0.0840(3) -0.8212(2) 0.0246(3) 0.0473(7) Uani 1 1 d . . .
 H3A H 0.1597 -0.8509 -0.0032 0.057 Uiso 1 1 calc R . .
 C4 C -0.0157(3) -0.7660(2) -0.0444(2) 0.0380(6) Uani 1 1 d . . .
 C5 C -0.0837(3) -0.8499(2) -0.1194(2) 0.0508(8) Uani 1 1 d . . .
 H5A H -0.1594 -0.8155 -0.1488 0.076 Uiso 1 1 calc R . .
 H5C H -0.1064 -0.9162 -0.0776 0.076 Uiso 1 1 calc R . .
 H5B H -0.0283 -0.8712 -0.1792 0.076 Uiso 1 1 calc R . .
 C6 C 0.0355(3) -0.6604(2) -0.1056(2) 0.0400(6) Uani 1 1 d . . .
 H6 H 0.1101 -0.6855 -0.1478 0.048 Uiso 1 1 calc R . .
 C7 C -0.0551(3) -0.6089(2) -0.1879(2) 0.0439(7) Uani 1 1 d . . .
 C8 C -0.0764(3) -0.6413(3) -0.2980(2) 0.0572(9) Uani 1 1 d . . .
 H8 H -0.0332 -0.6997 -0.3337 0.069 Uiso 1 1 calc R . .
 C9 C -0.1712(4) -0.5745(3) -0.3477(3) 0.0840(12) Uani 1 1 d . . .
 H9 H -0.1977 -0.5842 -0.4206 0.101 Uiso 1 1 calc R . .
 C10 C -0.2199(3) -0.4954(4) -0.2800(4) 0.0819(12) Uani 1 1 d . . .
 H10 H -0.2839 -0.4450 -0.3005 0.098 Uiso 1 1 calc R . .
 C11 C 0.1671(2) -0.4936(2) -0.0475(2) 0.0371(6) Uani 1 1 d . . .
 C12 C 0.1783(3) -0.4065(2) 0.0313(2) 0.0420(6) Uani 1 1 d . . .
 C13 C 0.2694(3) -0.3240(3) 0.0186(3) 0.0601(9) Uani 1 1 d . . .
 H13 H 0.2775 -0.2674 0.0718 0.072 Uiso 1 1 calc R . .
 C14 C 0.3489(4) -0.3242(3) -0.0719(3) 0.0696(10) Uani 1 1 d . . .
 H14 H 0.4114 -0.2687 -0.0789 0.084 Uiso 1 1 calc R . .
 C15 C 0.3362(3) -0.4055(3) -0.1514(3) 0.0623(9) Uani 1 1 d . . .
 H15 H 0.3888 -0.4045 -0.2134 0.075 Uiso 1 1 calc R . .
 C16 C 0.2454(3) -0.4894(3) -0.1401(2) 0.0484(7) Uani 1 1 d . . .
 H16 H 0.2366 -0.5440 -0.1953 0.058 Uiso 1 1 calc R . .

loop_
  _atom_site_aniso_label
  _atom_site_aniso_U_11
  _atom_site_aniso_U_22
  _atom_site_aniso_U_33
  _atom_site_aniso_U_23
  _atom_site_aniso_U_13
  _atom_site_aniso_U_12
 S1 0.0603(5) 0.0575(5) 0.0861(7) 0.0120(5) 0.0162(5) 0.0116(5)
 O1 0.0356(9) 0.0429(9) 0.0393(10) 0.0065(9) 0.0034(9) 0.0048(9)
 O2 0.0755(16) 0.0581(12) 0.0470(12) 0.0129(10) 0.0147(12) 0.0122(12)
 O3 0.0730(15) 0.0560(12) 0.0451(11) -0.0123(10) 0.0047(12) -0.0089(12)
 N1 0.0580(15) 0.0505(13) 0.0350(11) -0.0059(11) 0.0062(13) -0.0152(13)
 C1 0.0489(17) 0.0354(13) 0.0436(15) 0.0072(13) -0.0007(15) -0.0018(13)
 C2 0.0512(17) 0.0501(16) 0.0514(17) 0.0071(15) -0.0114(17) 0.0057(15)
 C3 0.0361(15) 0.0396(14) 0.066(2) 0.0004(15) -0.0007(16) 0.0050(13)
 C4 0.0355(14) 0.0360(13) 0.0424(14) 0.0017(13) 0.0007(13) 0.0025(12)
 C5 0.0521(19) 0.0477(15) 0.0525(17) -0.0048(15) -0.0017(16) -0.0062(14)
 C6 0.0394(16) 0.0430(14) 0.0375(13) -0.0049(13) 0.0041(14) -0.0018(13)
 C7 0.0456(16) 0.0394(14) 0.0468(15) 0.0040(13) 0.0021(15) -0.0065(14)
 C8 0.075(2) 0.0544(16) 0.0421(15) 0.0082(15) -0.0079(18) 0.0025(18)
 C9 0.105(3) 0.075(2) 0.072(2) 0.021(2) -0.030(3) -0.024(3)
 C10 0.059(2) 0.076(2) 0.111(3) 0.055(3) -0.017(2) -0.007(2)
 C11 0.0379(14) 0.0356(12) 0.0378(13) 0.0054(13) -0.0037(13) 0.0000(14)
 C12 0.0478(16) 0.0399(13) 0.0382(14) 0.0032(14) -0.0036(15) 0.0002(14)
 C13 0.068(2) 0.0459(16) 0.067(2) -0.0065(17) -0.005(2) -0.0122(17)
 C14 0.066(2) 0.056(2) 0.086(3) 0.003(2) 0.005(2) -0.0237(19)
 C15 0.0584(19) 0.0581(18) 0.070(2) 0.0069(19) 0.017(2) -0.0081(17)
 C16 0.0524(17) 0.0442(14) 0.0487(16) 0.0011(15) 0.0113(15) -0.0031(14)

_geom_special_details             
;
 All esds (except the esd in the dihedral angle between two l.s. planes) 
 are estimated using the full covariance matrix.  The cell esds are taken 
 into account individually in the estimation of esds in distances, angles 
 and torsion angles; correlations between esds in cell parameters are only 
 used when they are defined by crystal symmetry.  An approximate (isotropic) 
 treatment of cell esds is used for estimating esds involving l.s. planes. 
;
loop_
  _geom_bond_atom_site_label_1
  _geom_bond_atom_site_label_2
  _geom_bond_distance
  _geom_bond_site_symmetry_2
  _geom_bond_publ_flag
 S1 C7 1.705(3) . ?
 S1 C10 1.704(4) . ?
 O1 C1 1.343(3) . ?
 O1 C4 1.468(3) . ?
 O2 C1 1.215(3) . ?
 O3 H3 0.8200 . ?
 O3 C12 1.365(3) . ?
 N1 H1 0.8600 . ?
 N1 C6 1.452(3) . ?
 N1 C11 1.384(3) . ?
 C1 C2 1.450(4) . ?
 C2 H2 0.9300 . ?
 C2 C3 1.304(4) . ?
 C3 H3A 0.9300 . ?
 C3 C4 1.486(4) . ?
 C4 C5 1.518(4) . ?
 C4 C6 1.543(4) . ?
 C5 H5A 0.9600 . ?
 C5 H5C 0.9600 . ?
 C5 H5B 0.9600 . ?
 C6 H6 0.9800 . ?
 C6 C7 1.502(4) . ?
 C7 C8 1.401(4) . ?
 C8 H8 0.9300 . ?
 C8 C9 1.402(5) . ?
 C9 H9 0.9300 . ?
 C9 C10 1.341(6) . ?
 C10 H10 0.9300 . ?
 C11 C12 1.404(4) . ?
 C11 C16 1.388(4) . ?
 C12 C13 1.371(4) . ?
 C13 H13 0.9300 . ?
 C13 C14 1.373(5) . ?
 C14 H14 0.9300 . ?
 C14 C15 1.362(5) . ?
 C15 H15 0.9300 . ?
 C15 C16 1.379(4) . ?
 C16 H16 0.9300 . ?

loop_
  _geom_angle_atom_site_label_1
  _geom_angle_atom_site_label_2
  _geom_angle_atom_site_label_3
  _geom_angle
  _geom_angle_site_symmetry_1
  _geom_angle_site_symmetry_3
  _geom_angle_publ_flag
 S1 C10 H10 123.9 . . ?
 O1 C1 C2 109.2(2) . . ?
 O1 C4 C3 101.9(2) . . ?
 O1 C4 C5 107.6(2) . . ?
 O1 C4 C6 108.27(19) . . ?
 O2 C1 O1 120.7(2) . . ?
 O2 C1 C2 130.1(3) . . ?
 O3 C12 C11 115.7(2) . . ?
 O3 C12 C13 124.2(3) . . ?
 N1 C6 C4 108.5(2) . . ?
 N1 C6 H6 106.4 . . ?
 N1 C6 C7 113.5(2) . . ?
 N1 C11 C12 116.8(2) . . ?
 N1 C11 C16 125.1(3) . . ?
 C1 O1 C4 109.35(19) . . ?
 C1 C2 H2 126.0 . . ?
 C2 C3 H3A 124.3 . . ?
 C2 C3 C4 111.4(3) . . ?
 C3 C2 C1 108.0(3) . . ?
 C3 C2 H2 126.0 . . ?
 C3 C4 C5 112.3(2) . . ?
 C3 C4 C6 112.1(2) . . ?
 C4 C3 H3A 124.3 . . ?
 C4 C5 H5A 109.5 . . ?
 C4 C5 H5C 109.5 . . ?
 C4 C5 H5B 109.5 . . ?
 C4 C6 H6 106.4 . . ?
 C5 C4 C6 113.8(2) . . ?
 H5A C5 H5C 109.5 . . ?
 H5A C5 H5B 109.5 . . ?
 H5C C5 H5B 109.5 . . ?
 C6 N1 H1 118.1 . . ?
 C6 C7 S1 121.0(2) . . ?
 C7 C6 C4 115.0(2) . . ?
 C7 C6 H6 106.4 . . ?
 C7 C8 H8 124.3 . . ?
 C7 C8 C9 111.4(3) . . ?
 C8 C7 S1 110.8(2) . . ?
 C8 C7 C6 128.2(3) . . ?
 C8 C9 H9 123.2 . . ?
 C9 C8 H8 124.3 . . ?
 C9 C10 S1 112.2(3) . . ?
 C9 C10 H10 123.9 . . ?
 C10 S1 C7 91.99(19) . . ?
 C10 C9 C8 113.6(3) . . ?
 C10 C9 H9 123.2 . . ?
 C11 N1 H1 118.1 . . ?
 C11 N1 C6 123.7(2) . . ?
 C11 C16 H16 119.5 . . ?
 C12 O3 H3 109.5 . . ?
 C12 C13 H13 119.6 . . ?
 C12 C13 C14 120.7(3) . . ?
 C13 C12 C11 120.1(3) . . ?
 C13 C14 H14 120.0 . . ?
 C14 C13 H13 119.6 . . ?
 C14 C15 H15 119.9 . . ?
 C14 C15 C16 120.2(3) . . ?
 C15 C14 C13 120.1(3) . . ?
 C15 C14 H14 120.0 . . ?
 C15 C16 C11 120.9(3) . . ?
 C15 C16 H16 119.5 . . ?
 C16 C11 C12 118.0(2) . . ?
 C16 C15 H15 119.9 . . ?

loop_
  _geom_hbond_atom_site_label_D
  _geom_hbond_atom_site_label_H
  _geom_hbond_atom_site_label_A
  _geom_hbond_distance_DH
  _geom_hbond_distance_HA
  _geom_hbond_distance_DA
  _geom_hbond_angle_DHA
  _geom_hbond_site_symmetry_A
 O3 H3 O2 0.82 1.95 2.761(3) 172.3 4
